# Supplementary material for: A Pilot Study of Multiplex Ligation-Dependent Probe Amplification Evaluation of Copy Number Variations in Romanian Children with Congenital Heart Defects
Source: MDPI journal article supplement (doi:10.3390/genes15020207), 2024-02-05
Supplement: s1 [file s1]

**Table S1.** SALSA MLPA Probemix P311-B2 Congenital Heart Disease probe sequences

| Gene           | Exon                           | Partial sequence <sup>1</sup> | Length (nt) |
|----------------|--------------------------------|-------------------------------|-------------|
| <i>GATA4</i>   | Upstream                       | CATGCTCAAGAT-AGGCACTGGAGC     | 362         |
|                | Upstream                       | GAGGTTCTTCTT-TAAAAATCCATTC    | 229         |
|                | Exon 1                         | TTTCTTCCCTTT-CTTTGCTCCTTC     | 148         |
|                | Exon 3                         | CTCAGTAGATAT-GTTTGACGACTT     | 337         |
|                | Exon 4                         | CTACATGAAGCT-CCACGGGGTACG     | 355         |
|                | Exon 5                         | AAGAACCTGAAT-AAATCTAAGACA     | 142         |
|                | Exon 6                         | CAACTCCAGCAA-CGCCACCACCAG     | 238         |
|                | Exon 7                         | CACAAGGCTATG-CGTCTCCCGTCA     | 202         |
|                | Downstream ( <i>CTCB</i> gene) | AAGTGTAGCAAG-ATCTGTGAGCCT     | 130         |
| <i>NKX2-5</i>  | Exon 1                         | CCGGCCAAGTGT-GCGTCTGCCTTT     | 274         |
|                | Exon 1                         | AGGTGAGGAGGA-AACACAGGCCCC     | 190         |
|                | Exon 2                         | CGCTCCAGCTCA-TAGACCTGCGCC     | 427         |
|                | Exon 2                         | CGGGATTCCGCA-GAGCAACTCGGG     | 266         |
| <i>TBX5</i>    | Exon 1                         | GACGTTGGAAGA-AGACCTGGCCTA     | 166         |
|                | Intron 1                       | CTATTCTGGGTA-AGCAGTAAACCC     | 317         |
|                | Exon 2                         | GCCTGACGCAA-AGACCTGCCCTG      | 184         |
|                | Exon 3                         | AATCAAAGTGTT-TCTCCATGAAAG     | 195         |
|                | Exon 5                         | TCCTTCCAGAAA-CTCAAGCTCACC     | 346         |
|                | Exon 6                         | TACCAGCCTAGA-TTACACATCGTG     | 247         |
|                | Exon 8                         | GTGAGGCAAAAA-GTGGCCTCCAAC     | 160         |
|                | Exon 8                         | CCATTGTACCAA-GAGGAAAGGTGA     | 283         |
|                | Exon 9                         | AAGAAGATTCCT-TCTACCGCTCTA     | 174         |
|                | Exon 9                         | TTTGCTTTGGTT-TTGTCTGCCTT      | 303         |
| <i>BMP4</i>    | Exon 1                         | TGCAGGGACCTA-TGGTGAGCAAGG     | 255         |
|                | Intron 1                       | CGCAGGCCGAAA-GCTGTTACCGT      | 436         |
|                | Exon 3                         | TGGTAACCGAAT-GCTGATGGTCGT     | 454         |
|                | Exon 4                         | AACATCTGGAGA-ACATCCCAGGGA     | 391         |
| <i>CRELD1</i>  | Exon 4                         | CAAGTCAGACTT-CGAGTGCCACCG     | 136         |
|                | Exon 11                        | GCATTCCTCCATC-TTAACTGATTTA    | 408         |
| 22q11.2 region | <i>CDC45</i> gene              | ATGTTTCGTGTCC-GATTTCCGCAA     | 466         |
|                | <i>GP1BB</i> gene              | CACAACCGAGCT-GGTGCTGACCGG     | 208         |
|                | <i>DGCR8</i> gene              | GACTCAGCGACT-GCACCAGTGGCA     | 382         |

nt, nucleotides;

<sup>1</sup> 24 nucleotides adjacent to ligation site
